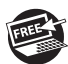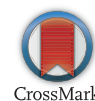

# An Extra 1,000 Steps Per Day Relates to Improved Cardiovascular Health in Children With Type 1 Diabetes

Diabetes Care 2016;39:e108–e109 | DOI: 10.2337/dc16-0526

Jemma Anderson,<sup>1,2</sup>  
Jennifer J. Couper,<sup>1,2</sup>  
Christine Mpundu-Kaambwa,<sup>3</sup>  
Lynne C. Giles,<sup>4</sup> Roger Gent,<sup>5</sup>  
Brian Coppin,<sup>6</sup> and Alexia S. Peña<sup>1,2</sup>

Children with type 1 diabetes report lower physical activity levels than those given in the current recommendations (1), and the effect of this on vascular health, measured objectively, is not well described. Children with type 1 diabetes have vascular structural changes (increased carotid and aortic intima-media thickness [cIMT and aIMT, respectively]) (2,3). aIMT relates to cIMT and both relate to cardiovascular risk factors. aIMT has been shown to be an earlier marker of atherosclerosis in children (2,3). We aimed to determine the relationship between activity levels and IMT in children with type 1 diabetes. We hypothesized that lower activity levels would relate to thicker IMT.

The study included 90 children with type 1 diabetes (41 boys, aged  $13.6 \pm 3.5$  years) and was approved by ethics committees (4). Children had evaluation of cIMT and aIMT as previously described (2–4). Inter- and intraobserver coefficients of variation for cIMT were 1.2% and 2.4% and for aIMT were 1.6% and 1.2%, respectively (3). Activity levels (step count/day) were measured using a SenseWear MiniForm Factor Armband (Body Media Inc., Pittsburgh, PA) worn for a minimum of 5 consecutive days including 1 weekend day.

The mean  $\pm$  SD BMI was  $22.43 \pm 3.23$  kg/m<sup>2</sup> and diabetes duration was  $5.5 \pm 3.9$  years, and median (IQR) HbA<sub>1c</sub> was 8.7% (8.1–9.9) (72 mmol/mol [65–85]). Eighty-eight of 90 (98%)

children wore the armband for  $23.2 \pm 0.76$  h/day. Forty-eight of 88 (55%) children took less than 10,000 steps a day (lower limit of recommended steps) (5).

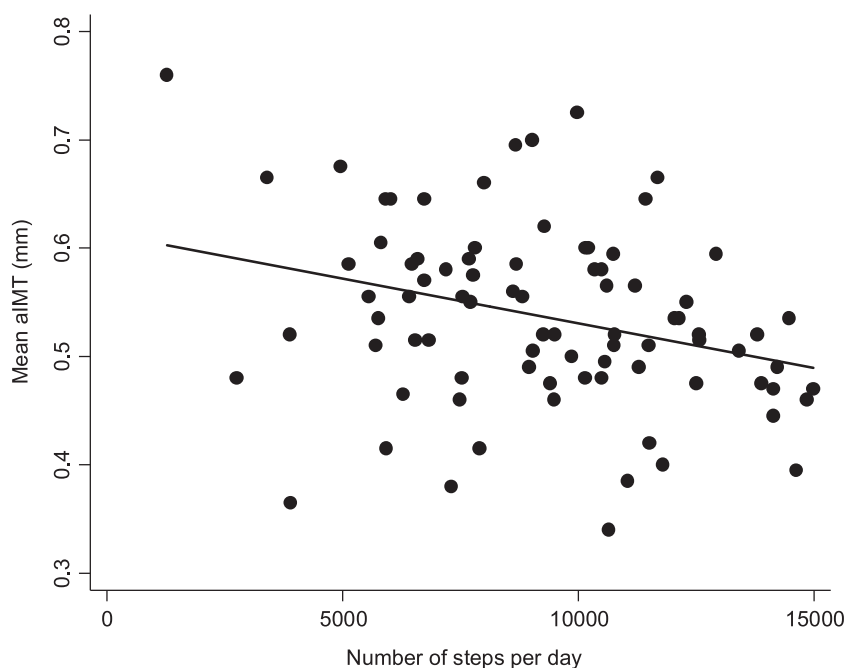

**Figure 1**—Mean aIMT related to average steps taken per day ( $r = -0.30$ ,  $P = 0.005$ ) in children with type 1 diabetes.

<sup>1</sup>Robinson Research Institute and Discipline of Paediatrics, The University of Adelaide, Adelaide, Australia

<sup>2</sup>Endocrinology and Diabetes Centre, Women's and Children's Hospital, Adelaide, Australia

<sup>3</sup>Discipline of Paediatrics, The University of Adelaide Research and Evaluation Unit, Women's and Children's Hospital, Adelaide, Australia

<sup>4</sup>Epidemiology and Biostatistics Unit, School of Public Health, Faculty of Health Sciences, The University of Adelaide, Adelaide, Australia

<sup>5</sup>Division of Medical Imaging, Women's and Children's Hospital, Adelaide, Australia

<sup>6</sup>Department of Paediatrics, Flinders Medical Centre and Flinders University, Adelaide, Australia

Corresponding author: Alexia S. Peña, alexia.pena@adelaide.edu.au.

Received 9 March 2016 and accepted 27 April 2016.

© 2016 by the American Diabetes Association. Readers may use this article as long as the work is properly cited, the use is educational and not for profit, and the work is not altered.

Mean and maximum aIMT related to average steps taken per day ( $r = -0.30$ ,  $P = 0.005$  and  $r = -0.29$ ,  $P = 0.007$ , respectively) (Fig. 1). An increase in step count of 1,000 steps/day related to a decrease in mean and maximum aIMT of 0.0082 mm and 0.0093 mm (95% CI  $-0.014$ ,  $-0.002$ ;  $P = 0.005$ , and 95% CI  $-0.016$ ,  $-0.003$ ;  $P = 0.007$ , respectively). The association was independent of age, HbA<sub>1c</sub>, BMI z-score, blood pressure, triglycerides, LDL, HDL, and total cholesterol. Children with a daily step count lower than 10,000 steps/day had higher mean and maximum aIMT than those with higher step counts ( $0.56 \pm 0.09$  vs.  $0.51 \pm 0.07$ ,  $P = 0.01$  and  $0.65 \pm 0.09$  vs.  $0.60 \pm 0.09$ ,  $P = 0.02$ , respectively). An increase in 1,000 steps per day was related to lower cardiovascular risk: 1.6 kg (95% CI  $-2.66$ ,  $-0.54$ ;  $P = 0.004$ ) reduction in weight; 1.02 mmHg ( $-1.55$ ,  $-0.49$ ;  $P < 0.001$ ) and 0.50 mmHg ( $-0.85$ ,  $-0.15$ ;  $P = 0.005$ ) reduction in systolic and diastolic blood pressure, respectively; 0.03 mmol/L (0.003, 0.05;  $P = 0.03$ ) increase in HDL cholesterol; and 0.02 mmol/L ( $-0.04$ ,  $-0.001$ ;  $P =$

0.04) reduction in triglycerides. There were no associations with cIMT.

We have demonstrated for the first time that the daily number of steps relates to early signs of atherosclerosis and adverse cardiovascular risk in children with type 1 diabetes. An important clinical message is that even a small increase in activity relates to better vascular structure and risk factors. Limitations of the study are the small cohort size and the cross-sectional analysis preventing exploration of causal factors. However, we achieved power of 0.91 to detect the correlation of 0.31 between steps per day and aIMT (assuming  $\alpha = 0.05$ ). Our findings emphasize the importance of including advice for the benefits of exercise in routine education for children with type 1 diabetes.

**Funding.** This work was partially supported by the Diabetes Australia Research Trust, Australasian Paediatric Endocrine Care grants, and the Women's and Children's Hospital Foundation.

**Duality of Interest.** No potential conflicts of interest relevant to this article were reported.

**Author Contributions.** J.A., J.J.C., and A.S.P. drafted the manuscript. J.A. and R.G. researched data. C.M.-K. and L.C.G. analyzed data. B.C.

coordinated one center. All authors reviewed, edited, and approved the final manuscript. J.A., L.C.G., and A.S.P. are the guarantors of this work and, as such, had full access to all the data in the study and takes responsibility for the integrity of the data and the accuracy of the data analysis.

## References

1. Alman AC, Talton JW, Wadwa RP, et al. Cardiovascular health in adolescents with type 1 diabetes: the SEARCH CVD study. *Pediatr Diabetes* 2014;15:502–510
2. Maftai O, Peña AS, Sullivan T, et al.; AdDIT Study Group. Early atherosclerosis relates to urinary albumin excretion and cardiovascular risk factors in adolescents with type 1 diabetes: Adolescent type 1 Diabetes cardio-renal Intervention Trial (AdDIT). *Diabetes Care* 2014;37:3069–3075
3. Harrington J, Peña AS, Gent R, Hirte C, Couper J. Aortic intima media thickness is an early marker of atherosclerosis in children with type 1 diabetes mellitus. *J Pediatr* 2010;156:237–241
4. Anderson J, Peña AS, Sullivan T, et al. Does metformin improve vascular health in children with type 1 diabetes? Protocol for a one year, double blind, randomised, placebo controlled trial. *BMC Pediatr* 2013;13:108
5. Tudor-Locke C, Craig CL, Beets MW, et al. How many steps/day are enough? for children and adolescents. *Int J Behav Nutr Phys Act* 2011;8:78
